# Supplementary material for: Integrated analysis of mRNA-seq and miRNA-seq in calyx abscission zone of Korla fragrant pear involved in calyx persistence
Source: PubMed Central journal article supplement (PMC6507046; doi:10.1186/s12870-019-1792-0), 2019-05-09
Supplement: 12870_2019_1792_MOESM8_ESM.pdf [file 12870_2019_1792_MOESM8_ESM.pdf]

# C\_5vsT\_5

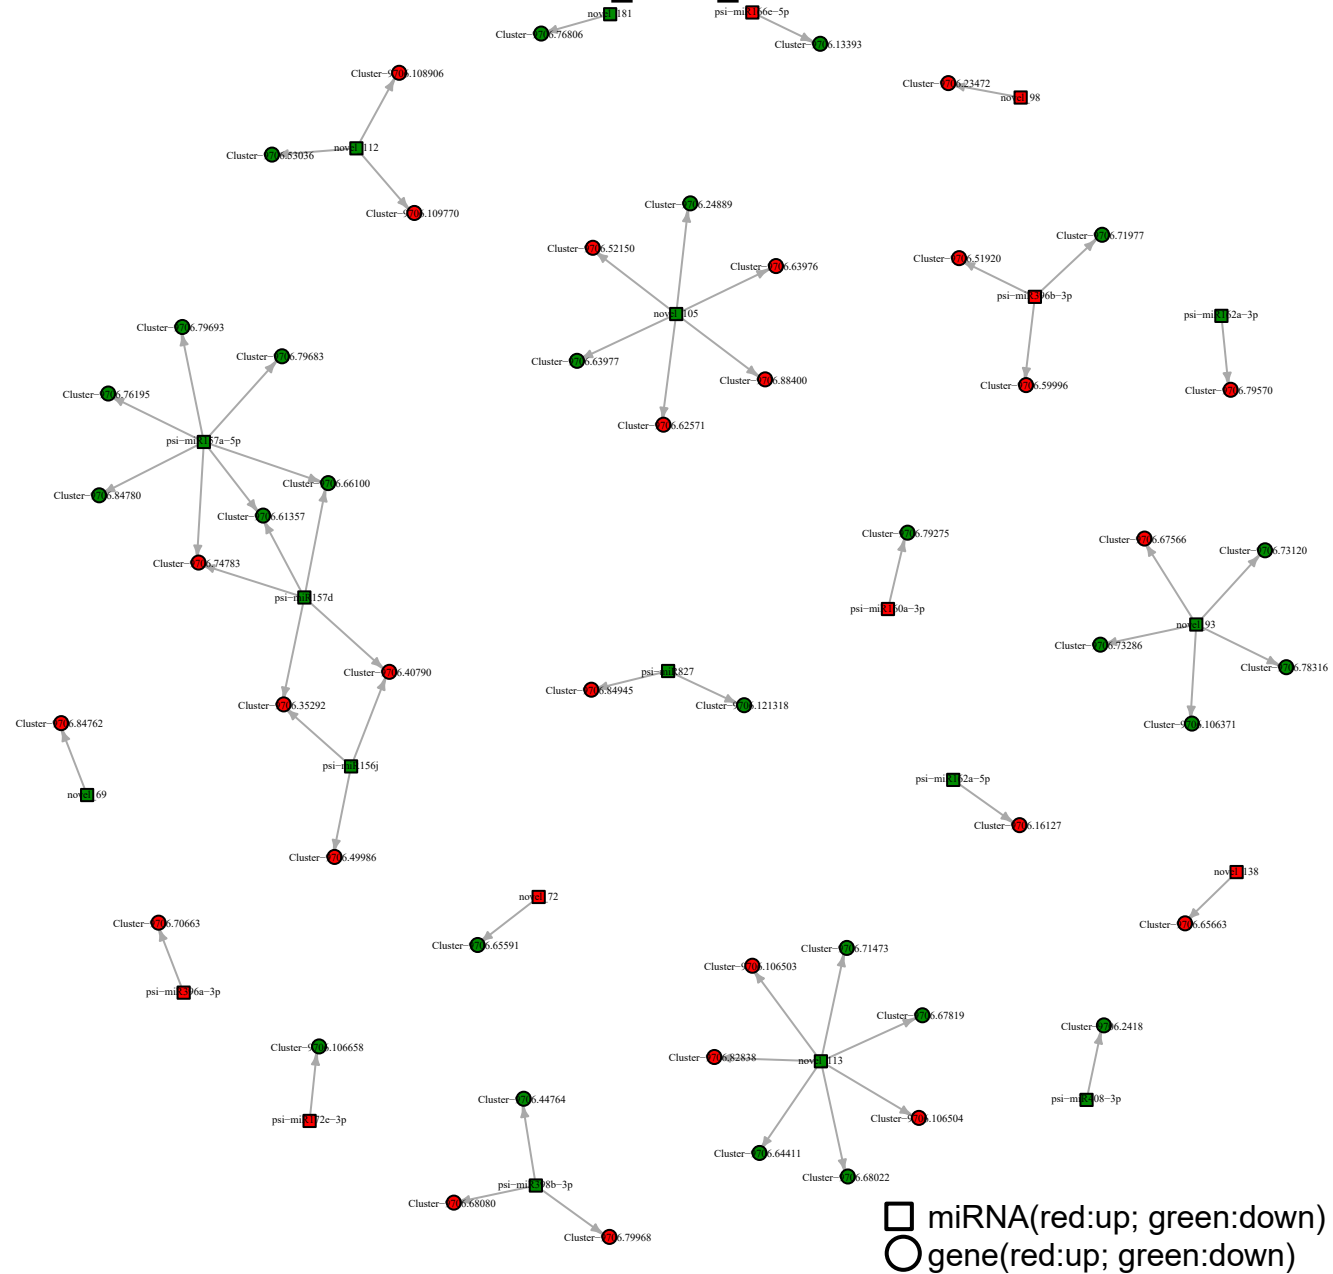









# T\_1vst\_5

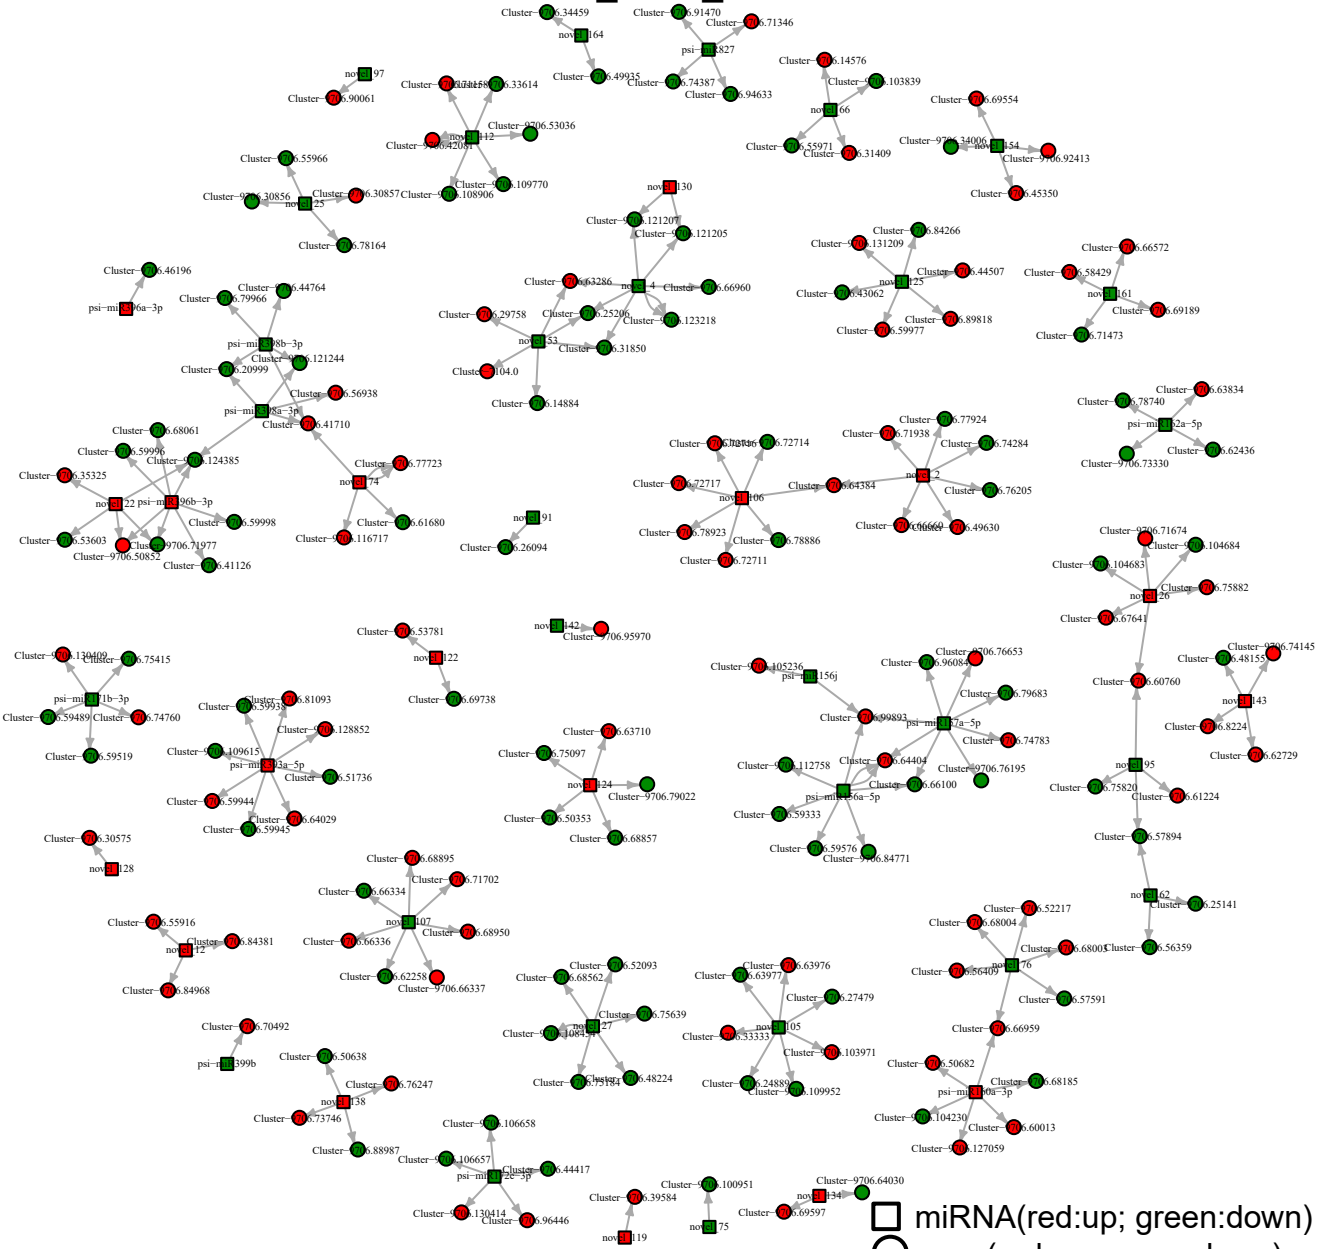

□ miRNA(red:up; green:down)  
○ gene(red:up; green:down)
